# Supplementary material for: Personalized and graph genomes reveal missing signal in epigenomic data
Source: PubMed Central journal article supplement (PMC7249353; doi:10.1186/s13059-020-02038-8), 2020-05-25
Supplement: 13059_2020_2038_MOESM1_ESM.pdf [file 13059_2020_2038_MOESM1_ESM.pdf]

Supporting figures

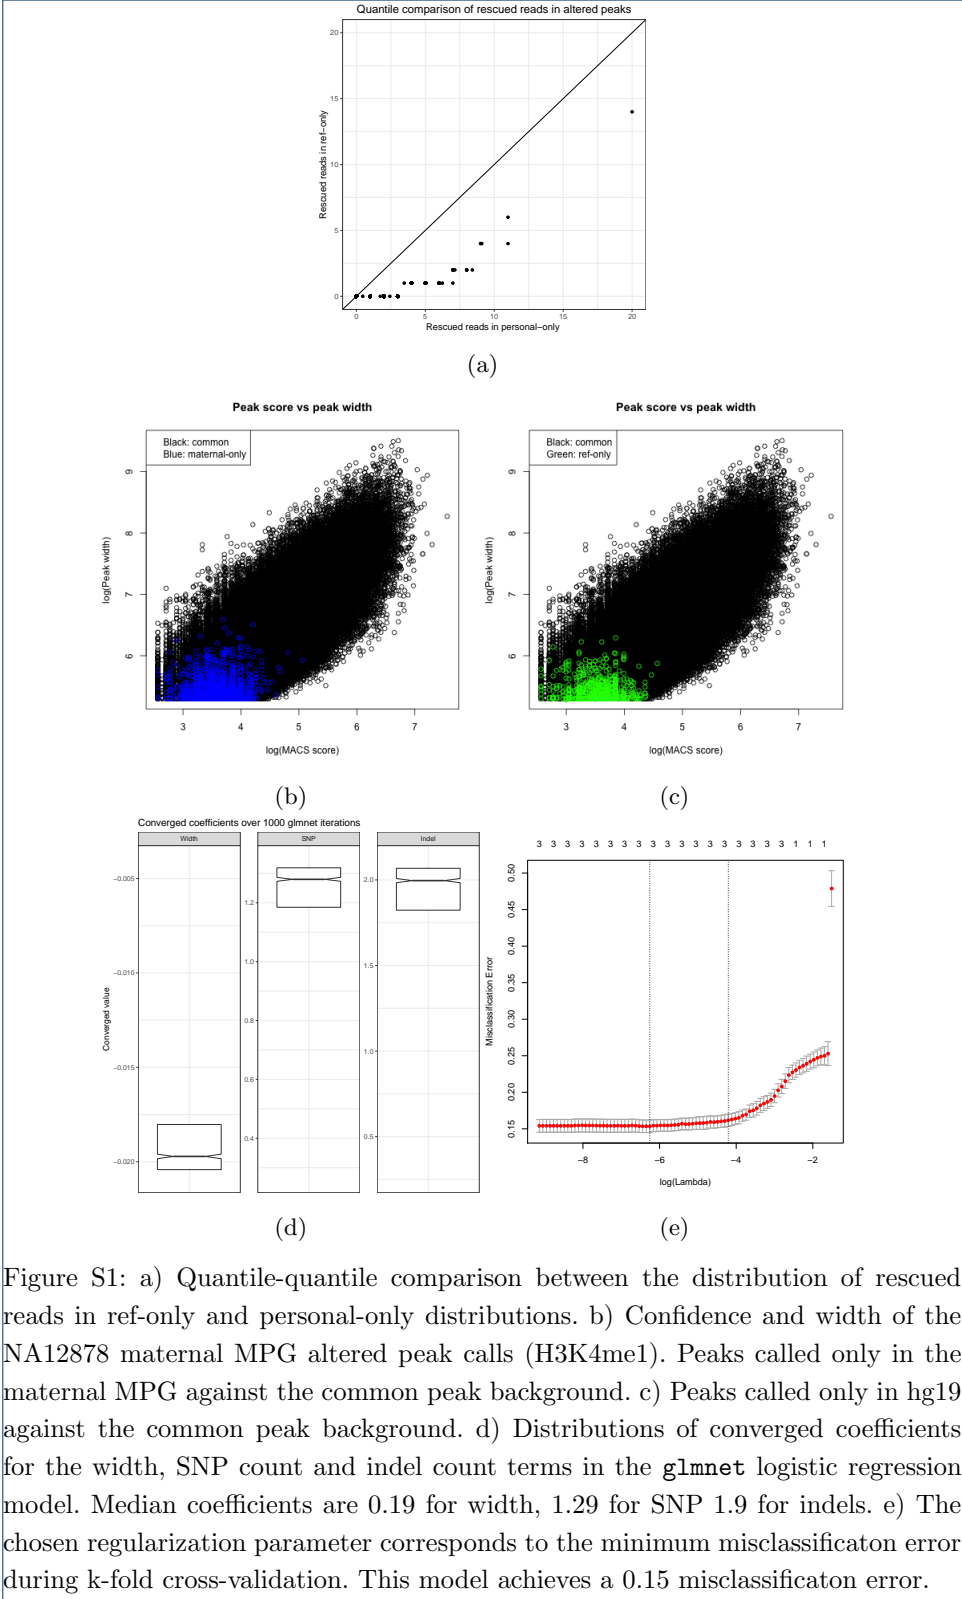

Figure S1: a) Quantile-quantile comparison between the distribution of rescued reads in ref-only and personal-only distributions. b) Confidence and width of the NA12878 maternal MPG altered peak calls (H3K4me1). Peaks called only in the maternal MPG against the common peak background. c) Peaks called only in hg19 against the common peak background. d) Distributions of converged coefficients for the width, SNP count and indel count terms in the glmnet logistic regression model. Median coefficients are 0.19 for width, 1.29 for SNP 1.9 for indels. e) The chosen regularization parameter corresponds to the minimum misclassification error during k-fold cross-validation. This model achieves a 0.15 misclassification error.

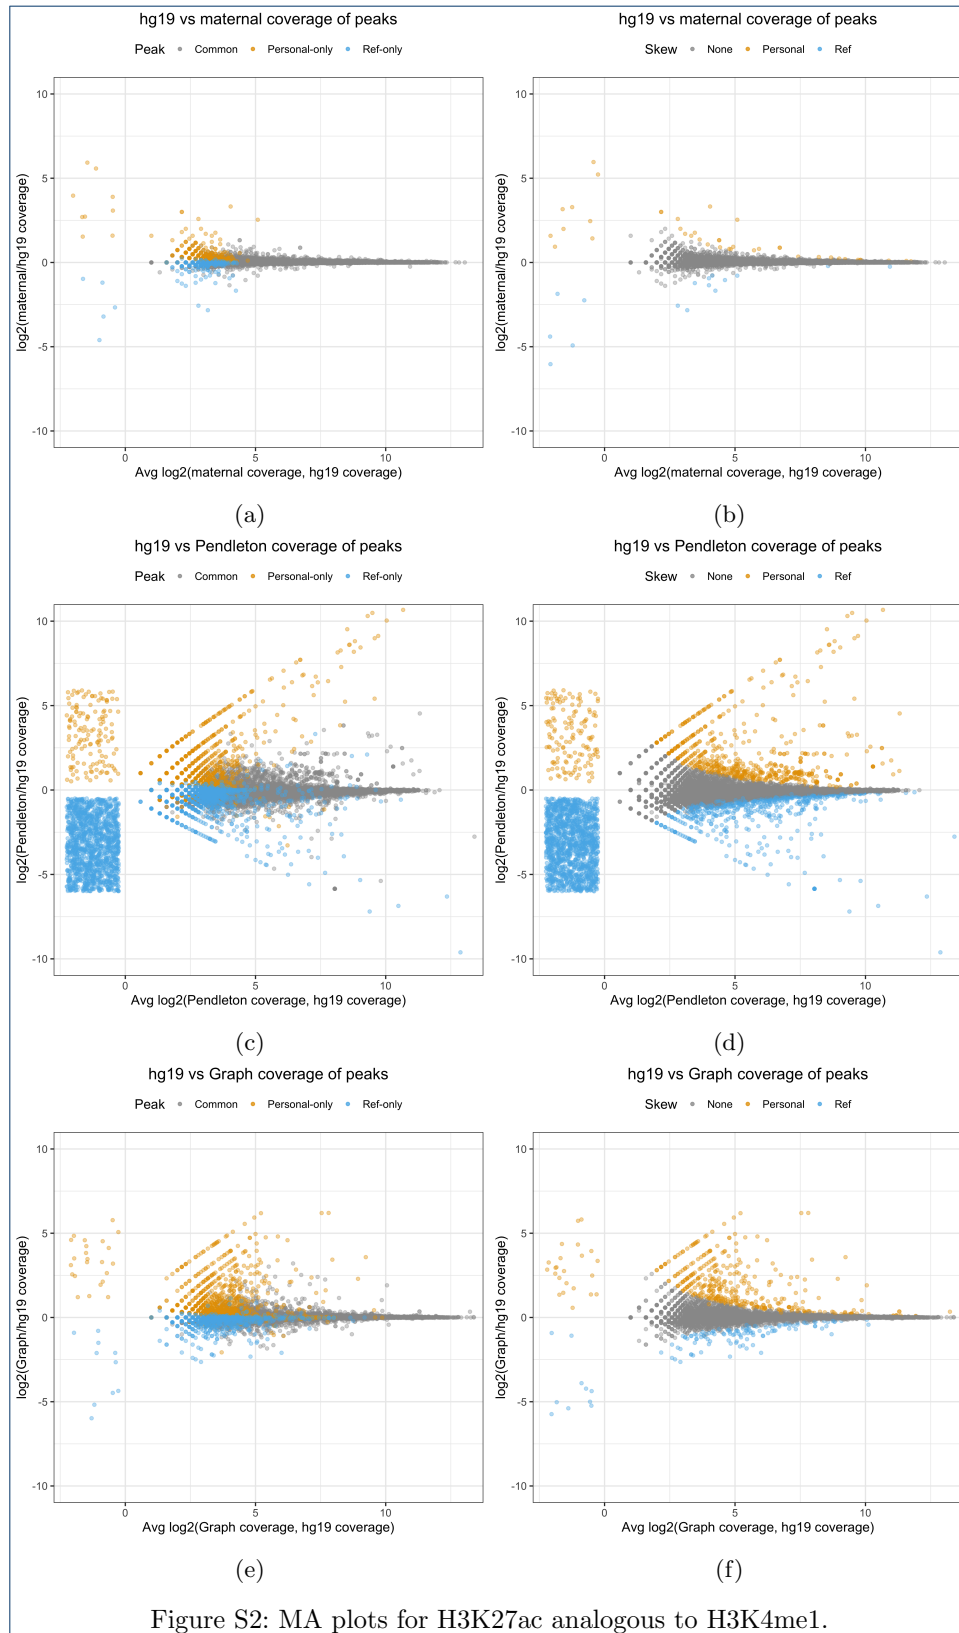

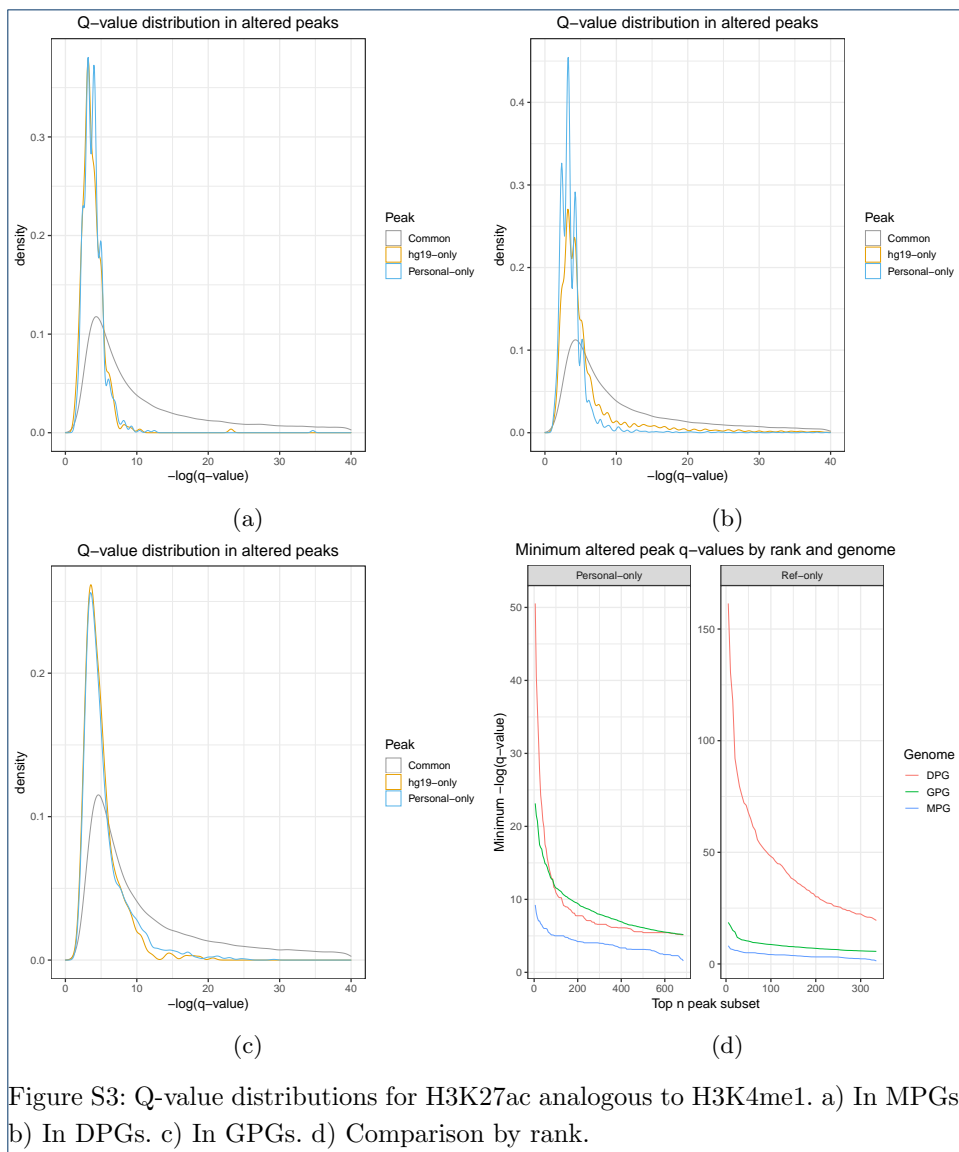

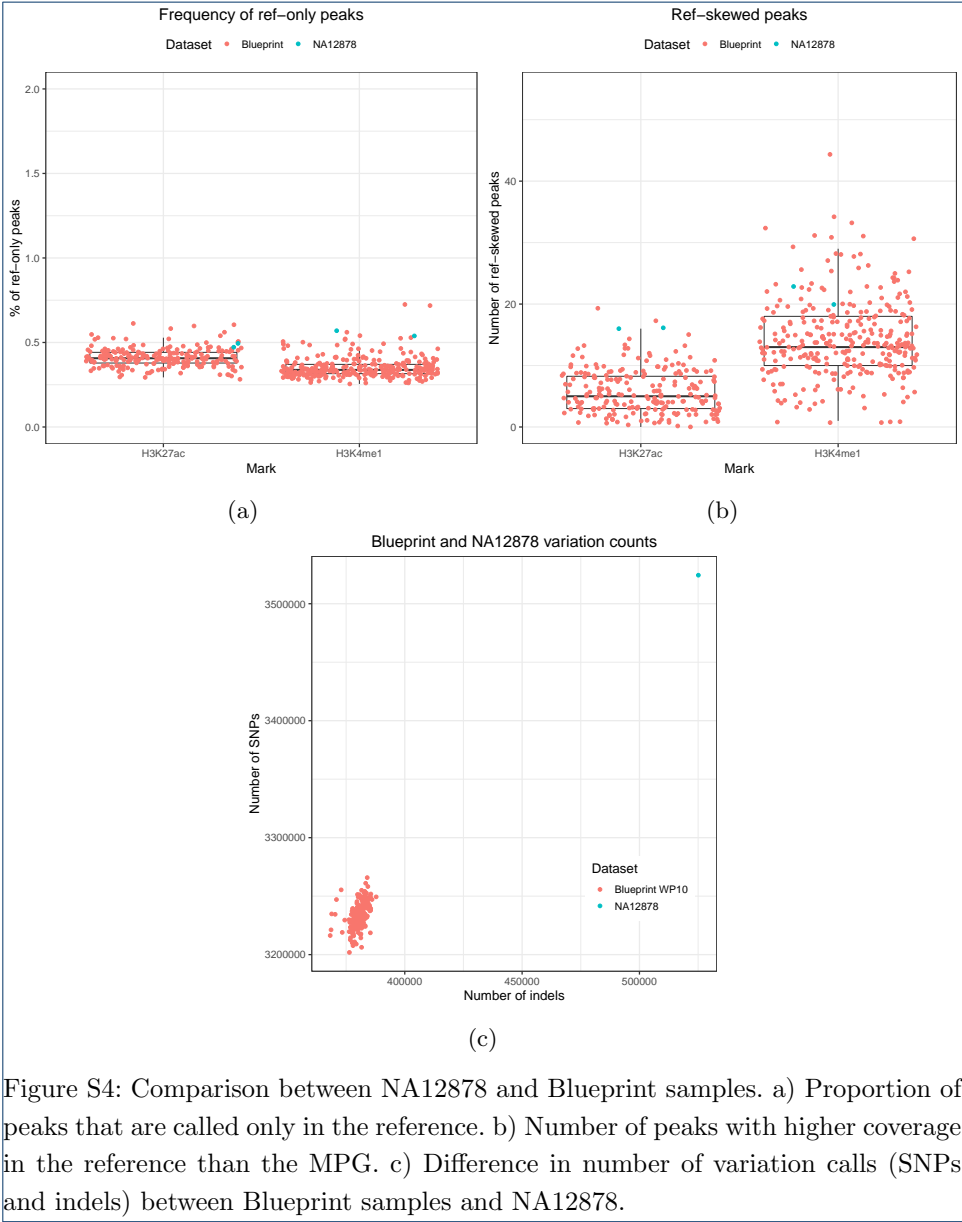

Figure S4: Comparison between NA12878 and Blueprint samples. a) Proportion of peaks that are called only in the reference. b) Number of peaks with higher coverage in the reference than the MPG. c) Difference in number of variation calls (SNPs and indels) between Blueprint samples and NA12878.

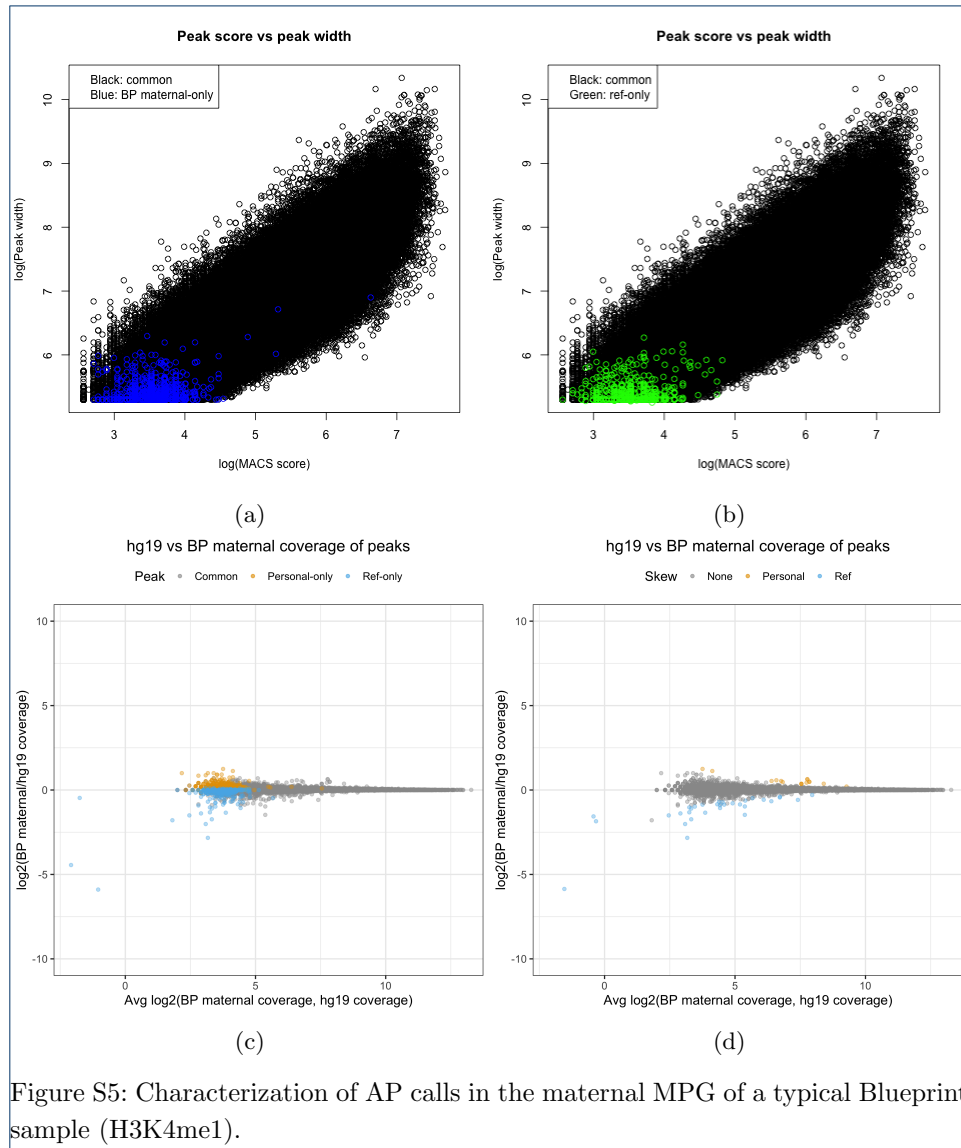

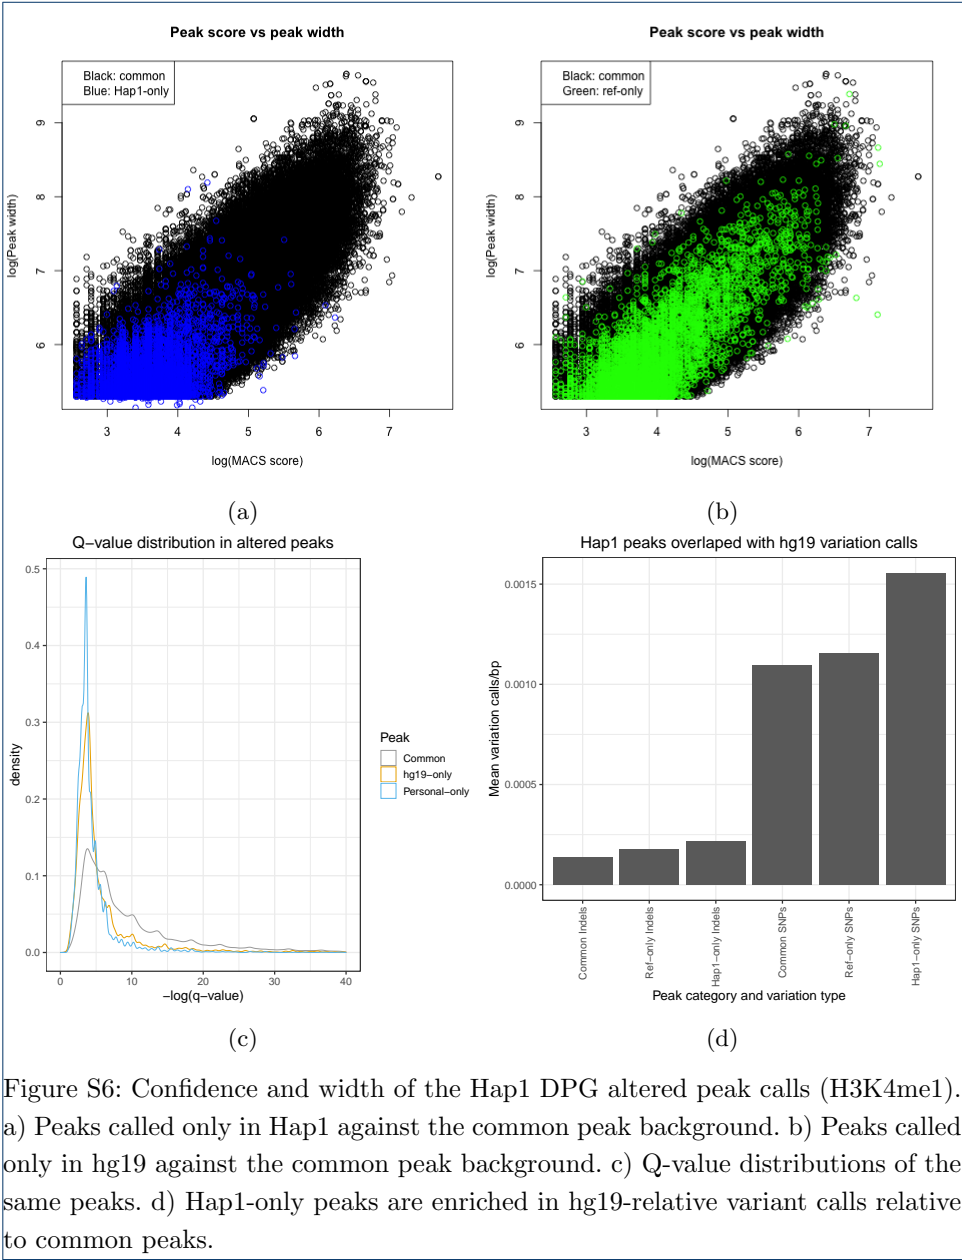

Figure S6: Confidence and width of the Hap1 DPG altered peak calls (H3K4me1). a) Peaks called only in Hap1 against the common peak background. b) Peaks called only in hg19 against the common peak background. c) Q-value distributions of the same peaks. d) Hap1-only peaks are enriched in hg19-relative variant calls relative to common peaks.

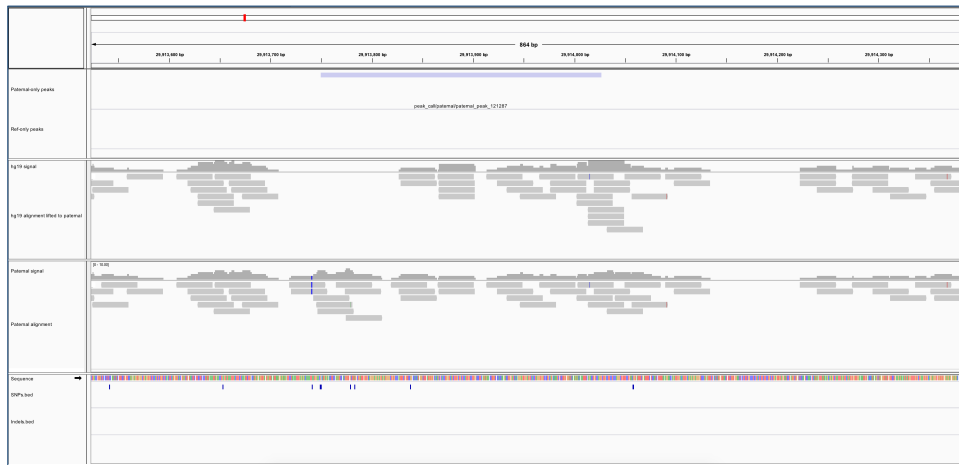

(a)

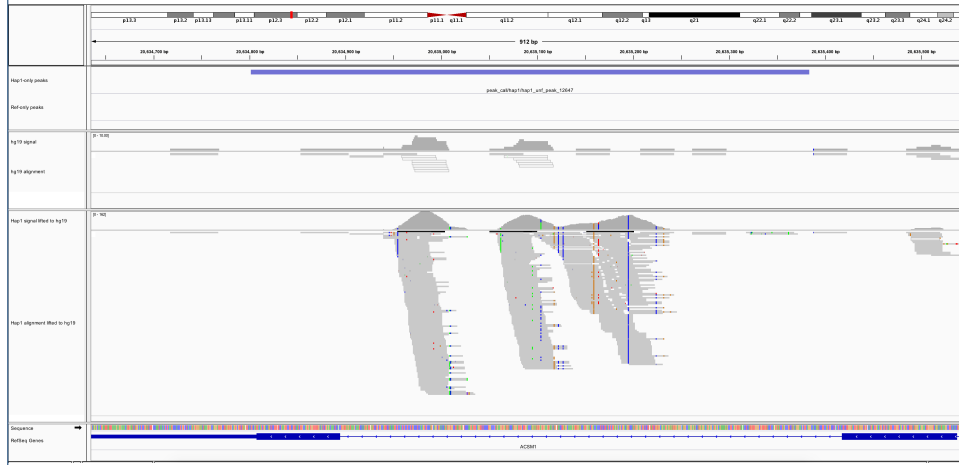

(b)

Figure S7: a) Typical personal-only peak in a NA12878 MPG. The small variations have a visible effect on only a few reads. (b) SD-free personal-only peak in the Hap1 DPG. Large scale changes in coverage become apparent with this approach.

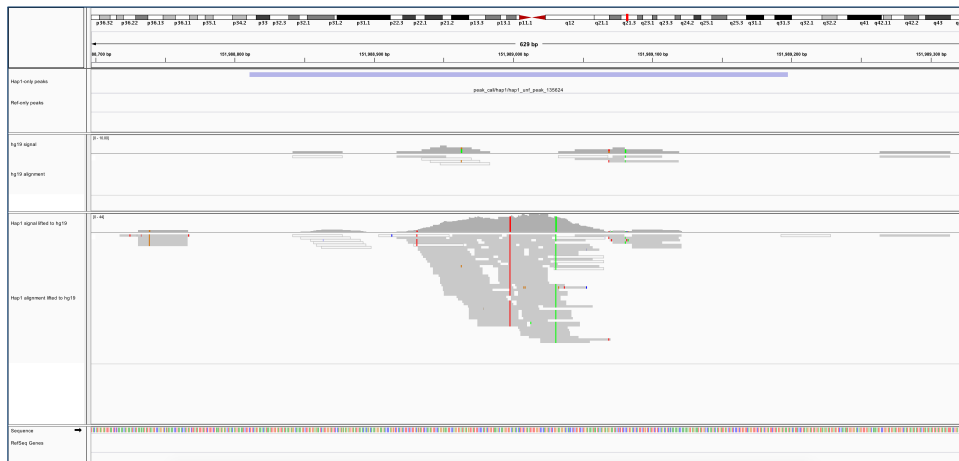

Figure S8: Hap1-only peak free of repeats and segmental duplications. Viewing this region in the UCSC genome browser shows overlaps with the hg19 self chain.

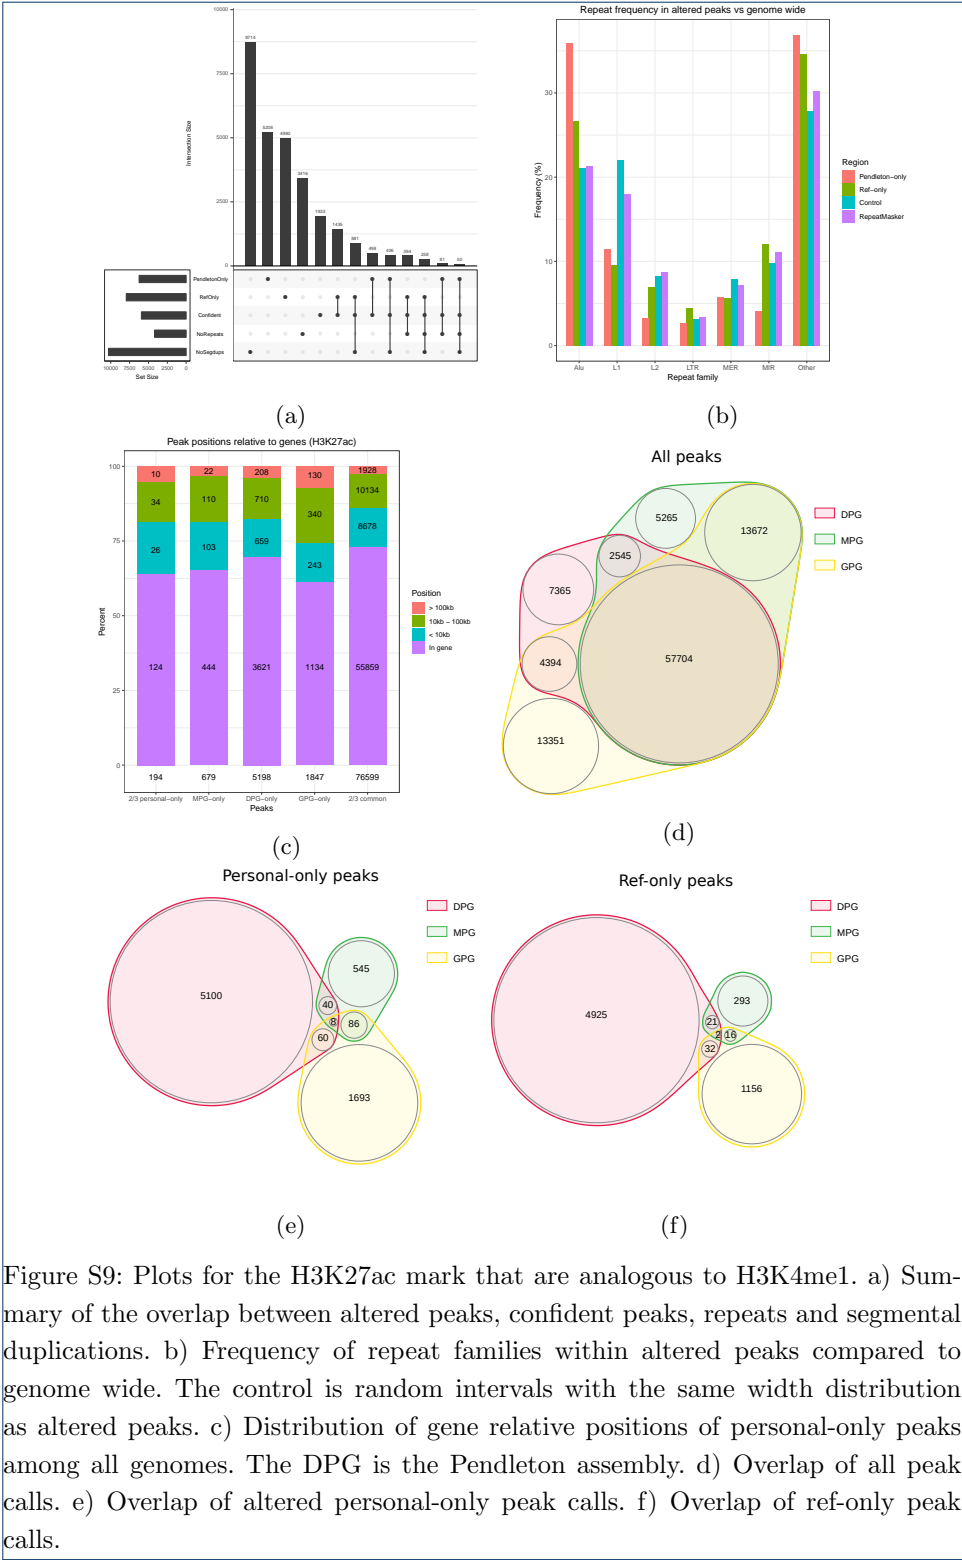

Figure S9: Plots for the H3K27ac mark that are analogous to H3K4me1. a) Summary of the overlap between altered peaks, confident peaks, repeats and segmental duplications. b) Frequency of repeat families within altered peaks compared to genome wide. The control is random intervals with the same width distribution as altered peaks. c) Distribution of gene relative positions of personal-only peaks among all genomes. The DPG is the Pendleton assembly. d) Overlap of all peak calls. e) Overlap of altered personal-only peak calls. f) Overlap of ref-only peak calls.



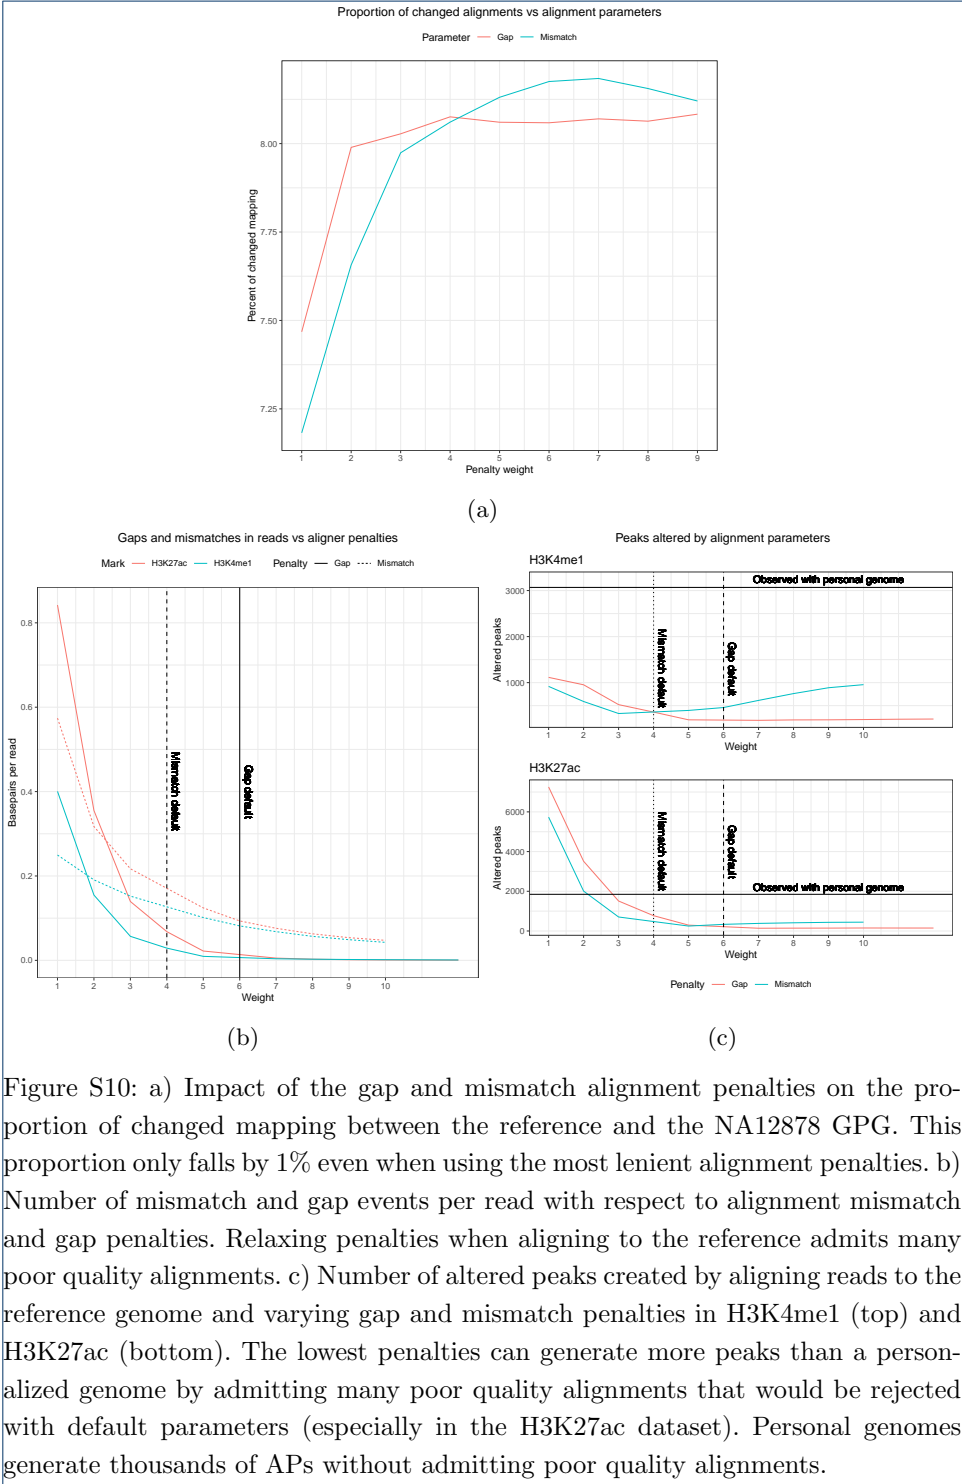

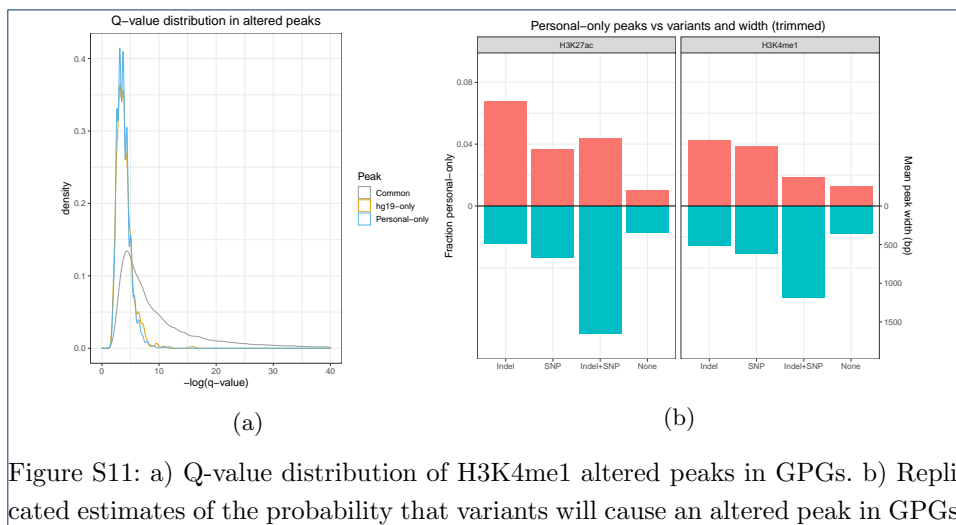

Figure S11: a) Q-value distribution of H3K4me1 altered peaks in GPGs. b) Repliated estimates of the probability that variants will cause an altered peak in GPGs.

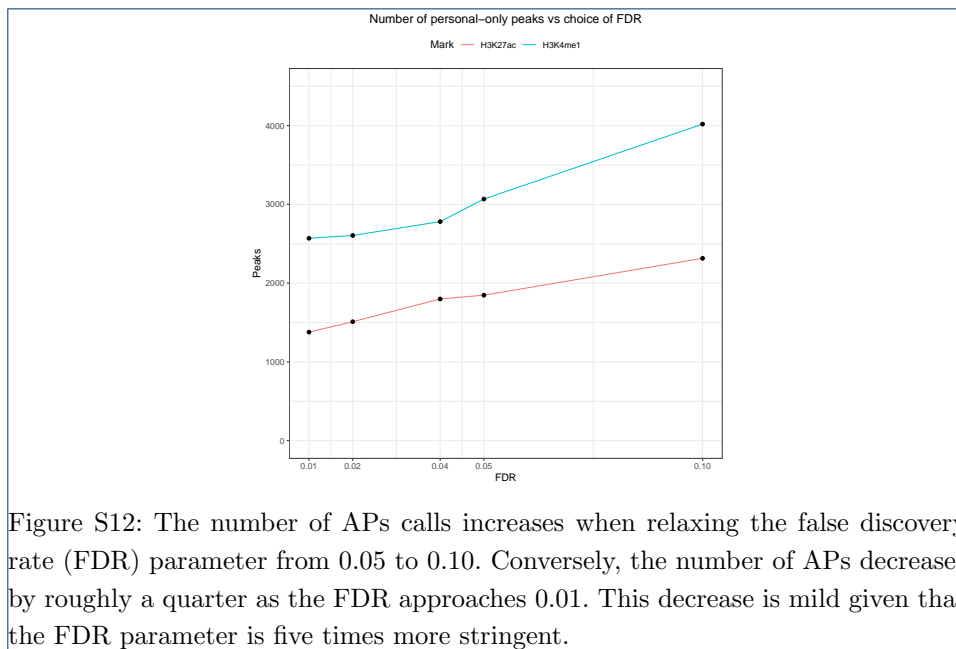

Figure S12: The number of APs calls increases when relaxing the false discovery rate (FDR) parameter from 0.05 to 0.10. Conversely, the number of APs decreases by roughly a quarter as the FDR approaches 0.01. This decrease is mild given that the FDR parameter is five times more stringent.

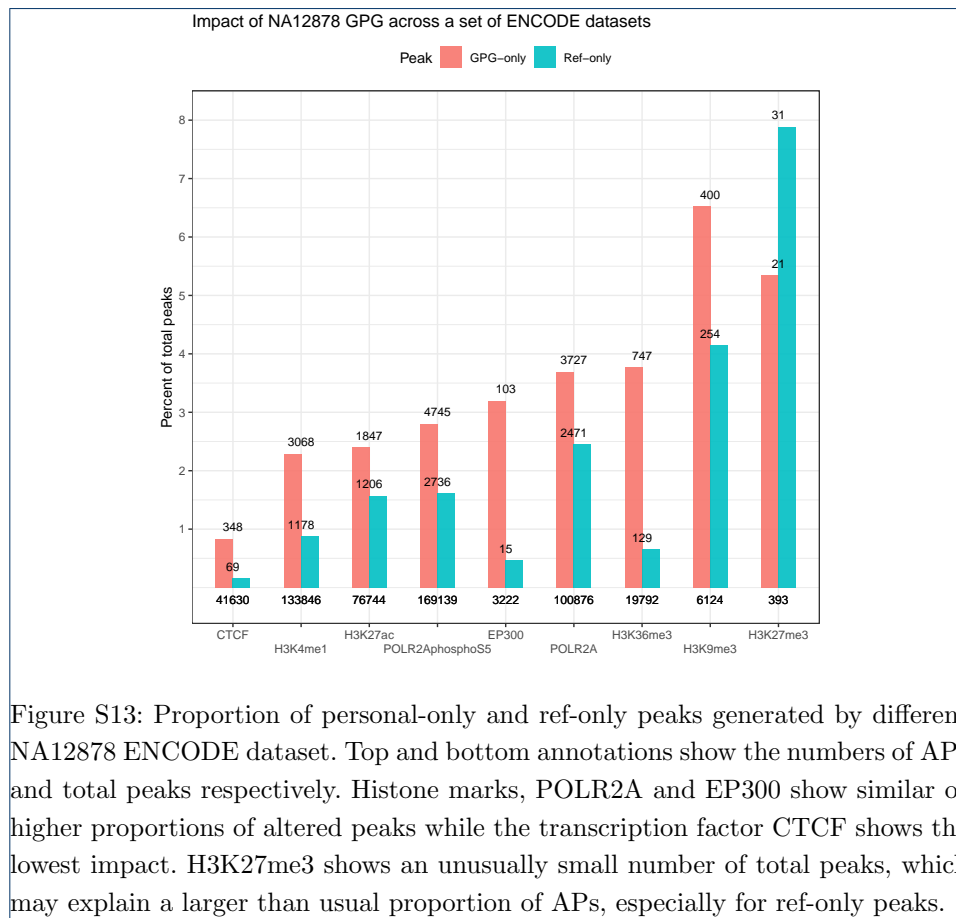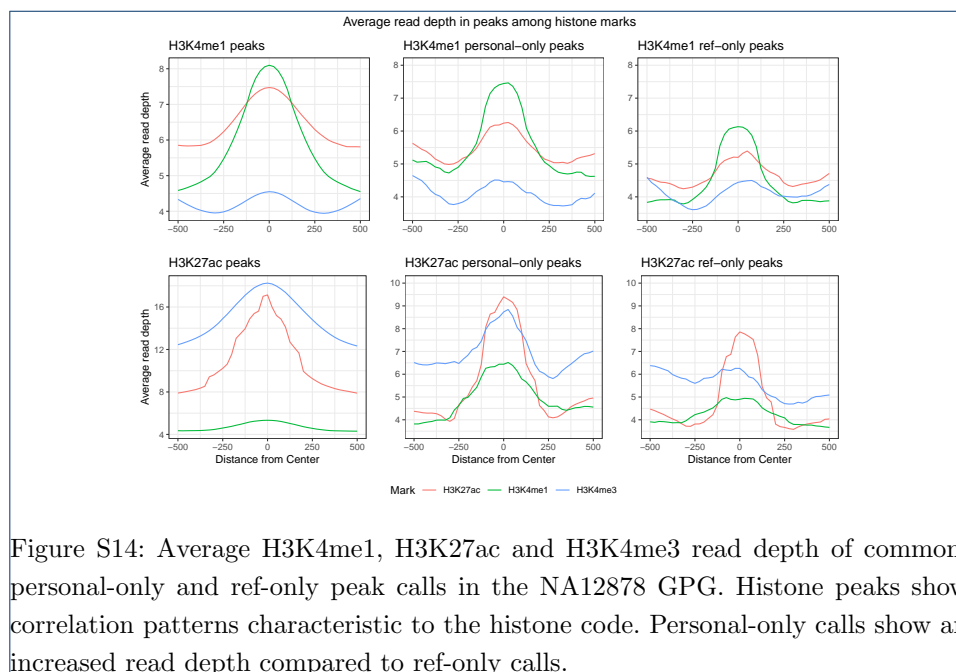

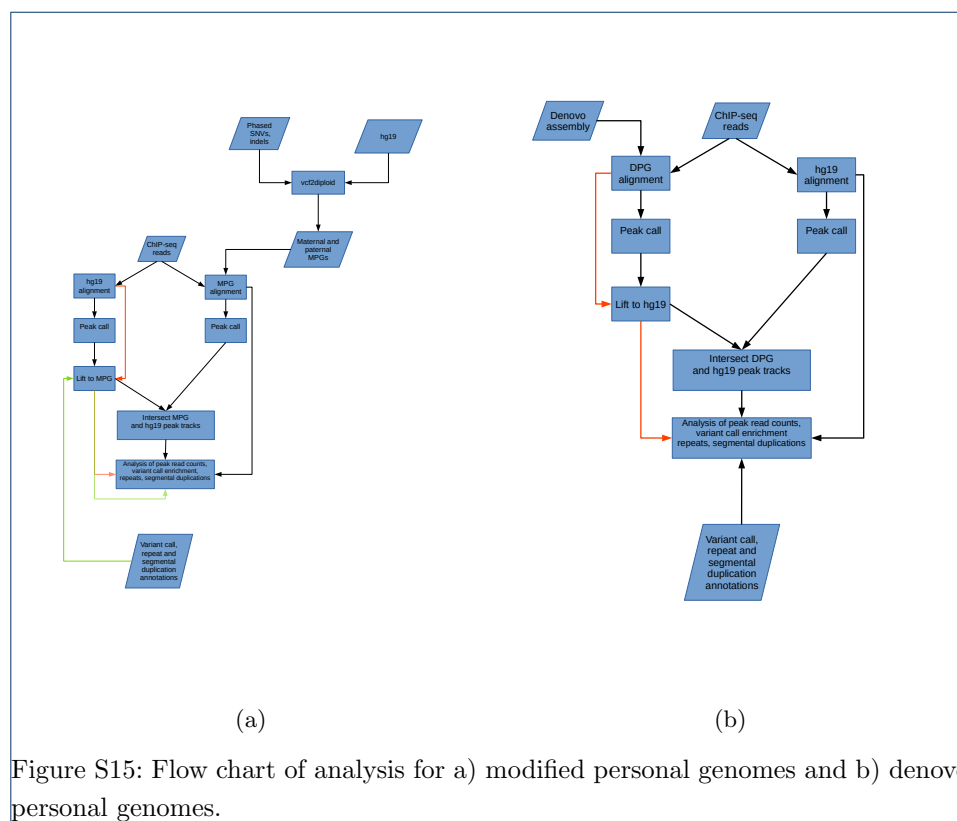

Figure S15: Flow chart of analysis for a) modified personal genomes and b) denovo personal genomes.

## Supporting tables

| Case (NA12878 MPG)                | 36bp reads |       | Different |
|-----------------------------------|------------|-------|-----------|
| Failed liftover                   | 1947562    | 1.1%  | Yes       |
| Lifted coordinates                | 167201030  | 90.4% | -         |
| ↔ Equal in hg19, MPG              | 162854003  | 88.0% | No        |
| ↔ Unequal in hg19, MPG            | 4347027    | 2.4%  | Yes       |
| Unmapped in hg19, mapped in MPG   | 122163     | 0.07% | Yes       |
| Mapped in hg19, unmapped in MPG   | 46565      | 0.03% | Yes       |
| Unmapped in hg19, unmapped in MPG | 15601588   | 8.4%  | No        |
| Total                             | 184918908  | 100%  | 3.6%      |

(a)

| Case (NA12878 DPG)                 | 36bp reads |       | Different |
|------------------------------------|------------|-------|-----------|
| Failed liftover                    | 8968154    | 4.8%  | Yes       |
| Lifted coordinates                 | 160169017  | 86.6% | -         |
| ↔ Equal in hg19, Hap1              | 152748687  | 82.6% | No        |
| ↔ Unequal in hg19, Hap1            | 7420330    | 4.0%  | Yes       |
| Unmapped in hg19, mapped in Hap1   | 156895     | 0.08% | Yes       |
| Mapped in hg19, unmapped in Hap1   | 1683155    | 0.91% | Yes       |
| Unmapped in hg19, unmapped in Hap1 | 13941687   | 7.54% | No        |
| Total                              | 184918908  | 100%  | 9.79%     |

(b)

| Case (NA12878 GPG) | 36bp reads |       |
|--------------------|------------|-------|
| Unequal mapping    | 15378825   | 8.3%  |
| Equal mapping      | 169540083  | 91.7% |
| Total              | 184918908  | 100   |

(c)

Table S1: a) Breakdown of WGS 36bp read alignment comparison between the reference and the NA12878 paternal MPG. The proportion of failed liftover, mapped/unmapped differences and unequal coordinate reads is 3.6%. This result is near identical in the both NA12878 MPGs. b) In the same comparison between the Hap1 DPG and the reference, the proportion is 9.79%. c) Comparing the alignments to the graph reference and the augmented NA12878 graph yields a proportion of 8.3% of reads with unequal mapping.

| Genome (NA12878) | Personal-skewed | Ref-skewed | Mark    |
|------------------|-----------------|------------|---------|
| MPG, Maternal    | 30              | 23         | H3K4me1 |
| MPG, Paternal    | 32              | 20         | H3K4me1 |
| DPG, Hap1        | 2216            | 3152       | H3K4me1 |
| DPG, Hap2        | 2221            | 3162       | H3K4me1 |
| DPG, Pendleton   | 1518            | 4320       | H3K4me1 |
| GPG              | 279             | 244        | H3K4me1 |
| MPG, Maternal    | 42              | 16         | H3K27ac |
| MPG, Paternal    | 50              | 16         | H3K27ac |
| DPG, Hap1        | 1497            | 1416       | H3K27ac |
| DPG, Hap2        | 1456            | 1422       | H3K27ac |
| DPG, Pendleton   | 781             | 1882       | H3K27ac |
| GPG              | 411             | 127        | H3K27ac |

Table S2: Number of peaks with skewed coverage in NA12878 MPGs and DPGs for H3K4me1 and H3K27ac marks. The read length across all rows was kept at 36bp.

| Version       | Mark    | common | personal-only | ref-only   |
|---------------|---------|--------|---------------|------------|
| MPG, Paternal | H3K4me1 | 129496 | 746 (0.6%)    | 456 (0.4%) |
| MPG, Maternal | H3K4me1 | 129497 | 747 (0.6%)    | 455 (0.4%) |
| MPG, Paternal | H3K27ac | 46830  | 336 (0.7%)    | 196 (0.4%) |
| MPG, Maternal | H3K27ac | 46831  | 335 (0.7%)    | 195 (0.4%) |

Table S3: Average number of altered peak calls in MPGs for the Blueprint samples for the same marks.

| Case (NA12878 MPG)                | 100b reads |       | Different |
|-----------------------------------|------------|-------|-----------|
| Failed liftover                   | 2030979    | 1.1%  | Yes       |
| Lifted coordinates                | 175123570  | 94.7% | -         |
| ↔ Equal in hg19, MPG              | 170876933  | 92.4% | No        |
| ↔ Unequal in hg19, MPG            | 4246637    | 2.3%  | Yes       |
| Unmapped in hg19, mapped in MPG   | 39169      | 0.02% | Yes       |
| Mapped in hg19, unmapped in MPG   | 19307      | 0.01% | Yes       |
| Unmapped in hg19, unmapped in MPG | 9632679    | 5.2%  | No        |
| Total                             | 184918908  | 100%  | 3.43%     |

(a)

| Case (NA12878 DPG)                 | 100bp reads |       | Different |
|------------------------------------|-------------|-------|-----------|
| Failed liftover                    | 9769845     | 5.3%  | Yes       |
| Lifted coordinates                 | 165311184   | 89.4% | -         |
| ↔ Equal in hg19, Hap1              | 158400964   | 85.7% | No        |
| ↔ Unequal in hg19, Hap1            | 6910220     | 3.7%  | Yes       |
| Unmapped in hg19, mapped in Hap1   | 49997       | 0.03% | Yes       |
| Mapped in hg19, unmapped in Hap1   | 749507      | 0.4%  | Yes       |
| Unmapped in hg19, unmapped in Hap1 | 9038375     | 4.9%  | No        |
| Total                              | 184918908   | 100%  | 9.43%     |

(b)

| Case (NA12878 GPG) | 100bp reads |        |
|--------------------|-------------|--------|
| Unequal mapping    | 14902323    | 8.06%  |
| Equal mapping      | 170016585   | 91.94% |
| Total              | 184918908   | 100    |

(c)

Table S4: a) Breakdown of WGS 100bp read alignment comparison between the reference and the NA12878 paternal MPG. The proportion of failed liftover, mapped/unmapped differences and unequal coordinate reads is 3.43%. This result is near identical in both NA12878 MPGs. b) In the same experiment with the Hap1 DPG and the reference, the proportion is 9.43%. c) Comparing the alignments to the graph reference and the augmented NA12878 graph yields a proportion of 8.06% of reads with unequal mapping.

| Ref-only peaks            | Number | Contain segmental duplications | Percent |
|---------------------------|--------|--------------------------------|---------|
| Null coverage in Hap1     | 2547   | 1781                           | 69.9    |
| ↔ Confident               | 1490   | 1062                           | 71.3    |
| Positive coverage in Hap1 | 4208   | 267                            | 6.3     |
| ↔ Confident               | 574    | 98                             | 17.1    |

Table S5: Ref-only peaks with null coverage in the Hap1 DPG are extremely enriched in segmental duplications.

| Peak type            | MACS2 (FDR 0.05) | IDR        |
|----------------------|------------------|------------|
| Reference peaks      | 29484            | 21764      |
| NA12878 GPG peaks    | 29491            | 21785      |
| Personal-only peaks  | 293 (0.99%)      | 138 (0.6%) |
| Reference-only peaks | 77 (0.26%)       | 85 (0.39%) |

Table S6: Summary of IDR results for the NA12878 ENCODE H3K4me3 dataset with replicates.
